# Supplementary material for: Investigation in the cannabigerol derivative VCE-003.2 as a disease-modifying agent in a mouse model of experimental synucleinopathy
Source: PubMed Central journal article supplement — Behav Brain Funct. 2024 Nov 1;20:28. doi: 10.1186/s12993-024-00256-9 (PMC11531178; doi:10.1186/s12993-024-00256-9), 2024-11-01
Supplement: 12993_2024_256_MOESM2_ESM.pdf [file 12993_2024_256_MOESM2_ESM.pdf]

## Supplementary File 2:

**Radioligand binding assays:** Methods employed in this study have been adapted from the scientific literature to maximize reliability and reproducibility. Reference standards were run as an integral part of each assay to ensure the validity of the results obtained.

| Assay Name                                        | Batch* | Spec. | Rep. | Conc. | % Inh. |
|---------------------------------------------------|--------|-------|------|-------|--------|
| Adenosine A <sub>1</sub>                          | 443228 | hum   | 2    | 10 µM | 9      |
| Adenosine A <sub>2A</sub>                         | 443229 | hum   | 2    | 10 µM | 10     |
| Adenosine A <sub>2B</sub>                         | 443528 | hum   | 2    | 10 µM | -21    |
| Adenosine A <sub>3</sub>                          | 443150 | hum   | 2    | 10 µM | 1      |
| Adrenergic α <sub>1A</sub>                        | 443231 | hum   | 2    | 10 µM | 1      |
| Adrenergic α <sub>1B</sub>                        | 443232 | hum   | 2    | 10 µM | 29     |
| Adrenergic α <sub>1D</sub>                        | 443199 | hum   | 2    | 10 µM | 6      |
| Adrenergic α <sub>2A</sub>                        | 443233 | hum   | 2    | 10 µM | 18     |
| Adrenergic α <sub>2B</sub>                        | 443268 | hum   | 2    | 10 µM | -3     |
| Adrenergic α <sub>2C</sub>                        | 443269 | hum   | 2    | 10 µM | 26     |
| Adrenergic β <sub>1</sub>                         | 443234 | hum   | 2    | 10 µM | 2      |
| Adrenergic β <sub>2</sub>                         | 443235 | hum   | 2    | 10 µM | 7      |
| Adrenergic β <sub>3</sub>                         | 443365 | hum   | 2    | 10 µM | -25    |
| Aldosterone                                       | 443311 | hum   | 2    | 10 µM | 32     |
| Androgen (Testosterone)                           | 443169 | hum   | 2    | 10 µM | -2     |
| Angiotensin AT <sub>1</sub>                       | 443327 | hum   | 2    | 10 µM | 8      |
| Angiotensin AT <sub>2</sub>                       | 443328 | hum   | 2    | 10 µM | 1      |
| APJ                                               | 443143 | hum   | 2    | 10 µM | 3      |
| Atrial Natriuretic Factor (ANF)                   | 443352 | gp    | 2    | 10 µM | 9      |
| Bombesin BB1                                      | 443366 | hum   | 2    | 10 µM | -10    |
| Bombesin BB2                                      | 443367 | hum   | 2    | 10 µM | -17    |
| Bombesin BB3                                      | 443366 | hum   | 2    | 10 µM | -3     |
| Bradykinin B <sub>1</sub>                         | 443260 | hum   | 2    | 10 µM | -18    |
| Bradykinin B <sub>2</sub>                         | 443261 | hum   | 2    | 10 µM | 20     |
| Calcitonin                                        | 443148 | hum   | 2    | 10 µM | 13     |
| Calcitonin Gene-Related Peptide CGRP <sub>1</sub> | 443149 | hum   | 2    | 10 µM | -4     |
| Calcium Channel L-Type, Benzothiazepine           | 443204 | rat   | 2    | 10 µM | 16     |
| Calcium Channel L-Type, Dihydropyridine           | 443237 | rat   | 2    | 10 µM | 58     |
| Calcium Channel L-Type, Phenylalkylamine          | 443534 | rat   | 2    | 10 µM | 47     |
| Calcium Channel N-Type                            | 443501 | rat   | 2    | 10 µM | -3     |
| Cannabinoid CB <sub>1</sub>                       | 443238 | hum   | 2    | 10 µM | -22    |
| Cannabinoid CB <sub>2</sub>                       | 443239 | hum   | 2    | 10 µM | 10     |
| Chemokine CCR1                                    | 443348 | hum   | 2    | 10 µM | -15    |
| Chemokine CCR2B                                   | 443372 | hum   | 2    | 10 µM | -1     |
| Chemokine CCR5 (Rhesus Macaque)                   | 443379 | rm    | 2    | 10 µM | -6     |

| Assay Name                                           | Batch* | Spec. | Rep. | Conc. | % Inh. |
|------------------------------------------------------|--------|-------|------|-------|--------|
| Chemokine CX3CR1                                     | 443385 | hum   | 2    | 10 µM | 17     |
| Chemokine CXCR1 (IL-8R <sub>A</sub> )                | 443379 | hum   | 2    | 10 µM | 9      |
| Chemokine CXCR2 (IL-8R <sub>B</sub> )                | 443317 | hum   | 2    | 10 µM | -10    |
| Chemokine CXCR3                                      | 443379 | hum   | 2    | 10 µM | 6      |
| Chemokine CXCR4                                      | 443381 | hum   | 2    | 10 µM | 2      |
| Cholecystokinin CCK <sub>1</sub> (CCK <sub>A</sub> ) | 443532 | hum   | 2    | 10 µM | -1     |
| Cholecystokinin CCK <sub>2</sub> (CCK <sub>B</sub> ) | 443273 | hum   | 2    | 10 µM | -15    |
| Colchicine                                           | 443368 | rat   | 2    | 10 µM | 6      |
| Corticotropin Releasing Factor CRF <sub>1</sub>      | 443366 | hum   | 2    | 10 µM | -2     |
| CysLT <sub>2</sub> (LTC <sub>4</sub> )               | 443356 | hum   | 2    | 10 µM | 19     |
| Dopamine D <sub>1</sub>                              | 443200 | hum   | 2    | 10 µM | 28     |
| Dopamine D <sub>2s</sub>                             | 443201 | hum   | 2    | 10 µM | 5      |
| Dopamine D <sub>3</sub>                              | 443200 | hum   | 2    | 10 µM | 34     |
| Dopamine D <sub>4,4</sub>                            | 443432 | hum   | 2    | 10 µM | 11     |
| Dopamine D <sub>5</sub>                              | 443580 | hum   | 2    | 10 µM | 16     |
| Endothelin ET <sub>A</sub>                           | 443155 | hum   | 2    | 10 µM | 23     |
| Endothelin ET <sub>B</sub>                           | 443163 | hum   | 2    | 10 µM | -2     |
| Epidermal Growth Factor (EGF)                        | 443223 | hum   | 2    | 10 µM | 6      |
| Estrogen ER <sub>α</sub>                             | 443304 | hum   | 2    | 10 µM | 12     |
| Estrogen ER <sub>β</sub>                             | 443305 | hum   | 2    | 10 µM | 3      |
| GABA <sub>A</sub> , Chloride Channel, TBOB           | 443188 | rat   | 2    | 10 µM | 52     |
| GABA <sub>A</sub> , Flunitrazepam, Central           | 443253 | rat   | 2    | 10 µM | 6      |
| GABA <sub>A</sub> , Muscimol, Central                | 443252 | rat   | 2    | 10 µM | 13     |
| Gabapentin                                           | 443459 | rat   | 2    | 10 µM | 21     |
| γ-Hydroxybutyric Acid (GHB) Receptor                 | 443380 | rat   | 2    | 10 µM | 3      |
| Glucagon                                             | 443355 | hum   | 2    | 10 µM | 2      |
| Glucocorticoid                                       | 443162 | hum   | 2    | 10 µM | 1      |
| Glutamate, AMPA                                      | 443320 | rat   | 2    | 10 µM | 16     |
| Glutamate, Kainate                                   | 443191 | rat   | 2    | 10 µM | 28     |
| Glutamate, Metabotropic, mGlu <sub>2</sub>           | 443318 | hum   | 2    | 10 µM | 10     |
| Glutamate, Metabotropic, mGlu <sub>5</sub>           | 443319 | hum   | 2    | 10 µM | -3     |
| Glutamate, NMDA, Agonism                             | 443189 | rat   | 2    | 10 µM | -4     |
| Glutamate, NMDA, Glycine                             | 443190 | rat   | 2    | 10 µM | 2      |
| Glutamate, NMDA, Phencyclidine                       | 443254 | rat   | 2    | 10 µM | 58     |
| Glutamate, NMDA, Polyamine                           | 443322 | rat   | 2    | 10 µM | 13     |
| Glycine, Strychnine-Sensitive                        | 443214 | rat   | 2    | 10 µM | 8      |
| Gonadotropin-Releasing Hormone                       | 443372 | hum   | 2    | 10 µM | -1     |

| Assay Name                                                  | Batch* | Spec. | Rep. | Conc. | % Inh. |
|-------------------------------------------------------------|--------|-------|------|-------|--------|
| Growth Hormone Secretagogue (GHS, Ghrelin)                  | 443150 | hum   | 2    | 10 µM | -3     |
| Histamine H <sub>1</sub>                                    | 443245 | hum   | 2    | 10 µM | 13     |
| Histamine H <sub>2</sub>                                    | 443336 | hum   | 2    | 10 µM | -12    |
| Histamine H <sub>3</sub>                                    | 443161 | hum   | 2    | 10 µM | -19    |
| Histamine H <sub>4</sub>                                    | 443412 | hum   | 2    | 10 µM | 28     |
| Imidazoline I <sub>2</sub> , Central                        | 443209 | rat   | 2    | 10 µM | 11     |
| Inositol Trisphosphate IP <sub>3</sub>                      | 443350 | rat   | 2    | 10 µM | -7     |
| Insulin                                                     | 443170 | rat   | 2    | 10 µM | 2      |
| Interleukin IL-1 R1                                         | 443314 | hum   | 2    | 10 µM | -6     |
| Interleukin IL-6                                            | 443315 | hum   | 2    | 10 µM | 0      |
| IP (PGI <sub>2</sub> )                                      | 443426 | hum   | 2    | 10 µM | 5      |
| Leukotriene, BLT (LTB <sub>4</sub> )                        | 443147 | hum   | 2    | 10 µM | -8     |
| Leukotriene, Cysteinyl CysLT <sub>1</sub>                   | 443324 | hum   | 2    | 10 µM | 2      |
| Melanin-Concentrating Hormone MCH1 (SLC1)                   | 443402 | hum   | 2    | 10 µM | -9     |
| Melanocortin MC <sub>1</sub>                                | 443196 | hum   | 2    | 10 µM | 2      |
| Melanocortin MC <sub>3</sub>                                | 443384 | hum   | 2    | 10 µM | 4      |
| Melanocortin MC <sub>4</sub>                                | 443197 | hum   | 2    | 10 µM | 2      |
| Melanocortin MC <sub>5</sub>                                | 443384 | hum   | 2    | 10 µM | 7      |
| Melatonin MT <sub>1</sub>                                   | 443382 | hum   | 2    | 10 µM | 4      |
| Melatonin MT <sub>2</sub>                                   | 443383 | hum   | 2    | 10 µM | 15     |
| Motilin                                                     | 443154 | hum   | 2    | 10 µM | -14    |
| Muscarinic M <sub>1</sub>                                   | 443240 | hum   | 2    | 10 µM | 11     |
| Muscarinic M <sub>2</sub>                                   | 443241 | hum   | 2    | 10 µM | 1      |
| Muscarinic M <sub>3</sub>                                   | 443242 | hum   | 2    | 10 µM | 9      |
| Muscarinic M <sub>4</sub>                                   | 443243 | hum   | 2    | 10 µM | 0      |
| Muscarinic M <sub>5</sub>                                   | 443243 | hum   | 2    | 10 µM | 2      |
| Muscarinic, Oxotremorine M                                  | 443413 | rat   | 2    | 10 µM | -10    |
| Neuropeptide Y Y <sub>1</sub>                               | 443194 | hum   | 2    | 10 µM | 3      |
| Neuropeptide Y Y <sub>2</sub>                               | 443419 | hum   | 2    | 10 µM | -17    |
| Neurotensin NT <sub>1</sub>                                 | 443326 | hum   | 2    | 10 µM | -13    |
| Nicotinic Acetylcholine α <sub>1</sub> , Bungarotoxin       | 443255 | hum   | 2    | 10 µM | 4      |
| Nicotinic Acetylcholine α <sub>3β4</sub>                    | 443258 | hum   | 2    | 10 µM | -4     |
| Nicotinic Acetylcholine α <sub>4β2</sub> , Cytisine         | 443420 | rat   | 2    | 10 µM | 8      |
| Nicotinic Acetylcholine α <sub>7</sub> , Bungarotoxin       | 443373 | rat   | 2    | 10 µM | 4      |
| Nicotinic Acetylcholine α <sub>7</sub> , Methyllycaconitine | 443415 | hum   | 2    | 10 µM | 2      |

| Assay Name                                         | Batch* | Spec. | Rep. | Conc.      | % Inh. |
|----------------------------------------------------|--------|-------|------|------------|--------|
| Opiate $\delta_1$ (OP1, DOP)                       | 443172 | hum   | 2    | 10 $\mu$ M | 6      |
| Opiate $\kappa$ (OP2, KOP)                         | 443172 | hum   | 2    | 10 $\mu$ M | 5      |
| Opiate $\mu$ (OP3, MOP)                            | 443389 | hum   | 2    | 10 $\mu$ M | 38     |
| Orexin OX <sub>1</sub>                             | 443367 | hum   | 2    | 10 $\mu$ M | 10     |
| Orexin OX <sub>2</sub>                             | 443374 | hum   | 2    | 10 $\mu$ M | 11     |
| Orphanin ORL <sub>1</sub>                          | 443386 | hum   | 2    | 10 $\mu$ M | 6      |
| Oxytocin                                           | 443407 | hum   | 2    | 10 $\mu$ M | 17     |
| Phorbol Ester                                      | 443256 | mouse | 2    | 10 $\mu$ M | -22    |
| Platelet Activating Factor (PAF)                   | 443265 | hum   | 2    | 10 $\mu$ M | 9      |
| Platelet-Derived Growth Factor (PDGF)              | 443144 | mouse | 2    | 10 $\mu$ M | -6     |
| Potassium Channel [K <sub>A</sub> ]                | 443194 | rat   | 2    | 10 $\mu$ M | 5      |
| Potassium Channel [K <sub>ATP</sub> ]              | 443104 | ham   | 2    | 10 $\mu$ M | 18     |
| Potassium Channel [SK <sub>CA</sub> ]              | 443421 | rat   | 2    | 10 $\mu$ M | -2     |
| Potassium Channel hERG                             | 443395 | hum   | 2    | 10 $\mu$ M | -35    |
| Progesterone PR-B                                  | 443168 | hum   | 2    | 10 $\mu$ M | 20     |
| Prostanoid CRTH2                                   | 443370 | hum   | 2    | 10 $\mu$ M | 12     |
| Prostanoid DP                                      | 443387 | hum   | 2    | 10 $\mu$ M | -74    |
| Prostanoid EP <sub>1</sub>                         | 443592 | hum   | 2    | 10 $\mu$ M | 19     |
| Prostanoid EP <sub>2</sub>                         | 443387 | hum   | 2    | 10 $\mu$ M | 17     |
| Prostanoid EP <sub>3</sub>                         | 443387 | hum   | 2    | 10 $\mu$ M | 19     |
| Prostanoid EP <sub>4</sub>                         | 443247 | hum   | 2    | 10 $\mu$ M | 17     |
| Prostanoid FP                                      | 443276 | hum   | 2    | 10 $\mu$ M | 5      |
| Purinergic P2X                                     | 443581 | rat   | 2    | 10 $\mu$ M | -12    |
| Purinergic P2Y, Non-Selective                      | 443156 | rat   | 2    | 10 $\mu$ M | 32     |
| Retinoid X Receptor RXR $\alpha$                   | 443165 | hum   | 2    | 10 $\mu$ M | 2      |
| Rolipram                                           | 443533 | rat   | 2    | 10 $\mu$ M | 5      |
| Ryanodine RyR3                                     | 443377 | rat   | 2    | 10 $\mu$ M | -4     |
| Serotonin (5-Hydroxytryptamine) 5-HT <sub>1A</sub> | 443193 | hum   | 2    | 10 $\mu$ M | 14     |
| Serotonin (5-Hydroxytryptamine) 5-HT <sub>1B</sub> | 443371 | rat   | 2    | 10 $\mu$ M | -8     |
| Serotonin (5-Hydroxytryptamine) 5-HT <sub>2B</sub> | 443251 | hum   | 2    | 10 $\mu$ M | 45     |
| Serotonin (5-Hydroxytryptamine) 5-HT <sub>2C</sub> | 443325 | hum   | 2    | 10 $\mu$ M | 19     |
| Serotonin (5-Hydroxytryptamine) 5-HT <sub>3</sub>  | 443342 | hum   | 2    | 10 $\mu$ M | -2     |
| Serotonin (5-Hydroxytryptamine) 5-HT <sub>4</sub>  | 443375 | gp    | 2    | 10 $\mu$ M | 17     |
| Serotonin (5-Hydroxytryptamine) 5-HT <sub>5A</sub> | 443208 | hum   | 2    | 10 $\mu$ M | 25     |
| Serotonin (5-Hydroxytryptamine) 5-HT <sub>6</sub>  | 443406 | hum   | 2    | 10 $\mu$ M | 10     |
| Serotonin (5-Hydroxytryptamine) 5-HT <sub>7</sub>  | 443370 | hum   | 2    | 10 $\mu$ M | 19     |
| Sigma $\sigma_1$                                   | 443244 | hum   | 2    | 10 $\mu$ M | 41     |

| Assay Name                                          | Batch* | Spec. | Rep. | Conc.      | % Inh. |
|-----------------------------------------------------|--------|-------|------|------------|--------|
| Sigma $\sigma_2$                                    | 443425 | rat   | 2    | 10 $\mu$ M | 34     |
| Sodium Channel, Site 2                              | 443427 | rat   | 2    | 10 $\mu$ M | 47     |
| Somatostatin sst1                                   | 443211 | hum   | 2    | 10 $\mu$ M | 2      |
| Somatostatin sst2                                   | 443212 | hum   | 2    | 10 $\mu$ M | 1      |
| Somatostatin sst3                                   | 443211 | hum   | 2    | 10 $\mu$ M | 17     |
| Somatostatin sst4                                   | 443213 | hum   | 2    | 10 $\mu$ M | 15     |
| Somatostatin sst5                                   | 443213 | hum   | 2    | 10 $\mu$ M | -1     |
| Tachykinin NK <sub>1</sub>                          | 443153 | hum   | 2    | 10 $\mu$ M | 19     |
| Tachykinin NK <sub>2</sub>                          | 443418 | hum   | 2    | 10 $\mu$ M | -10    |
| Tachykinin NK <sub>3</sub>                          | 443414 | hum   | 2    | 10 $\mu$ M | -3     |
| Thyroid Hormone                                     | 443312 | rat   | 2    | 10 $\mu$ M | 3      |
| Thyrotropin Releasing Hormone (TRH)                 | 443430 | hum   | 2    | 10 $\mu$ M | 15     |
| Transforming Growth Factor- $\beta$ (TGF- $\beta$ ) | 443145 | mouse | 2    | 10 $\mu$ M | -11    |
| Transporter, Adenosine                              | 443202 | gp    | 2    | 10 $\mu$ M | 16     |
| Transporter, Choline                                | 443353 | rat   | 2    | 10 $\mu$ M | 10     |
| Transporter, Dopamine (DAT)                         | 443272 | hum   | 2    | 10 $\mu$ M | 49     |
| Transporter, GABA                                   | 443275 | rat   | 2    | 10 $\mu$ M | 18     |
| Transporter, Glycine                                | 443152 | rat   | 2    | 10 $\mu$ M | -16    |
| Transporter, Norepinephrine (NET)                   | 443236 | hum   | 2    | 10 $\mu$ M | 44     |
| Transporter, Serotonin (5-Hydroxytryptamine) (SERT) | 443343 | hum   | 2    | 10 $\mu$ M | -91    |
| Transporter, Vesicular Monoamine (Non-Selective)    | 443412 | hum   | 2    | 10 $\mu$ M | 11     |
| Urotensin II                                        | 443419 | hum   | 2    | 10 $\mu$ M | 9      |
| Vasoactive Intestinal Peptide VIP <sub>1</sub>      | 443376 | hum   | 2    | 10 $\mu$ M | 6      |
| Vasoactive Intestinal Peptide VIP2/PACAP VPAC2      | 443379 | hum   | 2    | 10 $\mu$ M | -7     |
| Vasopressin V <sub>1A</sub>                         | 443270 | hum   | 2    | 10 $\mu$ M | -18    |
| Vasopressin V <sub>1B</sub>                         | 443424 | hum   | 2    | 10 $\mu$ M | 1      |
| Vasopressin V <sub>2</sub>                          | 443161 | hum   | 2    | 10 $\mu$ M | -16    |
| Vitamin D <sub>3</sub>                              | 443349 | hum   | 2    | 10 $\mu$ M | 19     |

Significant responses ( $\geq 50\%$  inhibition or stimulation for Biochemical assays) were noted at 10  $\mu$ M in the primary assays listed below,

| Cat #  | Assay Name                                          | Species | Conc.      | % Inh. | IC <sub>50</sub> * |
|--------|-----------------------------------------------------|---------|------------|--------|--------------------|
| 214600 | Calcium Channel L-Type, Dihydropyridine             | rat     | 10 $\mu$ M | 58     |                    |
| 226810 | GABA <sub>A</sub> , Chloride Channel, TBOB          | rat     | 10 $\mu$ M | 52     |                    |
| 233000 | Glutamate, NMDA, Phencyclidine                      | rat     | 10 $\mu$ M | 58     |                    |
| 268060 | Prostanoid DP                                       | hum     | 10 $\mu$ M | -74    |                    |
| 274030 | Transporter, Serotonin (5-Hydroxytryptamine) (SERT) | hum     | 10 $\mu$ M | -91    |                    |

Therefore, the IC<sub>50</sub>/EC<sub>50</sub> were calculated in a secondary assay confirming that these activities are only at concentration not reached in PK studies.

| <b>Assay Name</b>                          | <b>Species</b> | <b>Conc.</b> | <b>% Inh.</b> | <b>IC<sub>50</sub>*</b> | <b>K<sub>i</sub></b> | <b>n<sub>H</sub></b> |
|--------------------------------------------|----------------|--------------|---------------|-------------------------|----------------------|----------------------|
| Calcium Channel L-Type, Dihydropyridine    | rat            | 10 µM        | 58            | 8.99 µM                 | 5.78 µM              | 0.78                 |
| GABA <sub>A</sub> , Chloride Channel, TBOB | rat            | 100 µM       | 82            | 34.9 µM                 | 31.3 µM              | 1.37                 |
| Glutamate, NMDA, Phencyclidine             | rat            | 100 µM       | 70            | 39.1 µM                 | 26.5 µM              | 0.78                 |
| Calcium Channel L-Type, Dihydropyridine    | rat            | 10 µM        | 58            | 8.99 µM                 | 5.78 µM              | 0.78                 |
| Glutamate, NMDA, Phencyclidine             | rat            | 100 µM       | 70            | 39.1 µM                 | 26.5 µM              | 0.78                 |
| GABA <sub>A</sub> , Chloride Channel, TBOB | rat            | 100 µM       | 82            | 34.9 µM                 | 31.3 µM              | 1.37                 |

### **In vitro Micronucleus Assay with VCE-003.2 in Cultured Peripheral Human**

**Lymphocytes:** The objective of this study was to evaluate VCE-003.2 for its ability to induce micronuclei in cultured human lymphocytes, either in the presence or absence of a metabolic activation system (S9-mix). The possible clastogenicity and aneugenicity of VCE-003.2 was tested in two independent experiments. Whole blood samples obtained from young healthy subjects were treated with an anti-coagulant (heparin) and cultured in the presence of a mitogen (phytohaemagglutinin). Briefly, stimulated lymphocytes were exposed to selected doses of VCE-003.2. Prior to the mitosis (during or after exposure of VCE-003.2) the chemical cytochalasin B was added to the cultures. Cytochalasin B arrests the formation of actin filaments. Consequently, the cell is not able to divide, but nuclear division continues. In this way, cytochalasin B allows discrimination between cells that have undergone nuclear division (binucleated) and cells that have not (mononucleated). Cells were harvested, stained and interphase cells (bi-nucleated cells) were analyzed microscopically for the presence of micronuclei. Results from cultures treated with VCE-003.2 were compared with control (vehicle) treated cultures.

In the first cytogenetic assay, the test material was tested up to 40 and 45 µg/mL for a 3 hours exposure time with 27 hours harvest time in the absence and presence of S9-fraction, respectively. Appropriate toxicity was reached at this dose level (Table 1).

In the second cytogenetic assay, the test material was tested up to 20 µg/mL for a 24 hours exposure time with 24 hours harvest time in the absence of S9-mix. Appropriate toxicity was reached at this dose level (Table 2).

VCE-003.2 did not induce a statistically significant or biologically relevant increase in the number of binucleated cells with micronuclei in the absence and presence of S9-mix, in either of the two experiments.

**Table 1: Number of Binucleated Cells with Micronuclei of Human Lymphocyte Cultures Treated with VCE-003.2 in the First Cytogenetic Assay**

Without metabolic activation (-S9-mix)

3 hours exposure time, 27 hours harvest time

| Concentration<br>( $\mu\text{g/mL}$ ) | Cytostasis<br>(%) | Number of binucleated cells<br>with micronuclei <sup>1)</sup> |      |        |
|---------------------------------------|-------------------|---------------------------------------------------------------|------|--------|
|                                       |                   | 1000                                                          | 1000 | 2000   |
|                                       |                   | A                                                             | B    | A+B    |
| 0                                     | 0                 | 1                                                             | 1    | 2      |
| 10                                    | 3                 | 0                                                             | 0    | 0      |
| 30                                    | 32                | 1                                                             | 2    | 3      |
| 40                                    | 56                | 2                                                             | 1    | 3      |
| 0.20 MMC-C                            | 33                | 3                                                             | 7    | 10*    |
| 0.25 MMC-C                            | 61                | 8                                                             | 7    | 15**   |
| 0.05 Colch                            | 35                | 6                                                             | 8    | 14**   |
| 0.1 Colch                             | 87                | 11                                                            | 14   | 25**** |

With metabolic activation (+S9-mix)

3 hours exposure time, 27 hours harvest time

| Concentration<br>( $\mu\text{g/mL}$ ) | Cytostasis<br>(%) | Number of binucleated cells<br>with micronuclei <sup>1)</sup> |      |        |
|---------------------------------------|-------------------|---------------------------------------------------------------|------|--------|
|                                       |                   | 1000                                                          | 1000 | 2000   |
|                                       |                   | A                                                             | B    | A+B    |
| 0                                     | 0                 | 1                                                             | 1    | 2      |
| 10                                    | 12                | 2                                                             | 2    | 4      |
| 40                                    | 20                | 1                                                             | 1    | 2      |
| 45                                    | 47                | 1                                                             | 2    | 3      |
| 7.5 CP                                | 60                | 13                                                            | 13   | 26**** |

\*) Significantly different from control group (Fisher's exact test), \* P < 0.05, \*\* P < 0.01, \*\*\* P < 0.001 or \*\*\*\* P < 0.0001.

<sup>1)</sup> 1000 binucleated cells were scored for the presence of micronuclei. Duplicate cultures are indicated by A and B.



**Table 2: Number of Binucleated Cells with Micronuclei of Human Lymphocyte Cultures Treated with VCE-003.2 in the Second Cytogenetic Assay**

Without metabolic activation (-S9-mix)  
24 hours exposure time, 24 hours harvest time

| Concentration<br>(µg/mL) | Cytostasis<br>(%) | Number of binucleated cells with<br>micronuclei <sup>1)</sup> |                 |      |
|--------------------------|-------------------|---------------------------------------------------------------|-----------------|------|
|                          |                   | 1000                                                          | 1000            | 2000 |
|                          |                   | A                                                             | B               | A+B  |
| 0                        | 0                 | 3                                                             | 2               | 5    |
| 5                        | -25               | 1                                                             | 0               | 1    |
| 10                       | -9                | 1                                                             | 2               | 3    |
| 20                       | 52                | 3                                                             | 5               | 8    |
| 0.125 MMC-C              | 23                | 10                                                            | 8               | 18** |
| 0.01 Colch               | 7                 | 4                                                             | 5               | 9    |
| 0.05 Colch               | 100               | 4 <sup>2)</sup>                                               | 2 <sup>2)</sup> | 6**  |

\*) Significantly different from control group (Fisher's exact test), \* P < 0.05, \*\* P < 0.01, \*\*\* P < 0.001 or \*\*\*\* P < 0.0001.

1) 1000 binucleated cells were scored for the presence of micronuclei.  
Duplicate cultures are indicated by A and B.

2) 213 and 94 binucleated cells were scored for the presence of micronuclei, respectively.

**In vivo Micronucleus Test in Bone Marrow Cells of the Rat with VCE-003.2:** male animals were dosed twice by oral gavage with vehicle (sesame oil) or with 500, 1000 or 2000 mg VCE-003.2 per kg body weight. As the positive control, slides were used from three animals dosed once by oral gavage with 19 mg cyclophosphamide (CP) per kg body weight. In total 4 treatment groups were used, each consisting of 5 animals. No treatment related clinical signs or mortality were noted in any animal treated with VCE-003.2 or control animals receiving vehicle or cyclophosphamide. Bone marrow was sampled 48 hours after the first dosing. A drop of the cell suspension was spread in clean slides and after Giemsa staining the number of micronucleated polychromatic erythrocytes was counted in at least 4000 polychromatic erythrocytes (with a maximum deviation of 5%). The ratio of polychromatic to normochromatic erythrocytes was determined by counting and differentiating at least the first 1000 erythrocytes at the same time. Micronuclei were only counted in polychromatic erythrocytes. Averages and standard deviations were calculated.

The mean number of micronucleated polychromatic erythrocytes per group and the mean ratio of polychromatic to normochromatic erythrocytes are presented in Table 3. The mean

number of micronucleated polychromatic erythrocytes scored in VCE-003.2 treated groups were compared with the corresponding solvent control group.

**Table 3. Mean Number of Micronucleated Polychromatic Erythrocytes and Ratio of Polychromatic/Normochromatic Erythrocytes**

| Group | Treatment       | Number of Animals | Dose (mg/kg body weight) | Number of micronucleated polychromatic erythrocytes (mean $\pm$ S.D.) <sup>(1)</sup> | Ratio polychromatic / normochromatic erythrocytes (mean $\pm$ S.D.) <sup>(2)</sup> |
|-------|-----------------|-------------------|--------------------------|--------------------------------------------------------------------------------------|------------------------------------------------------------------------------------|
| MALES |                 |                   |                          |                                                                                      |                                                                                    |
| 1     | Vehicle Control | 5                 | 0                        | 2.4 $\pm$ 1.1                                                                        | 0.92 $\pm$ 0.05                                                                    |
| 2     | VCE-003.2       | 5                 | 500                      | 3.4 $\pm$ 2.5                                                                        | 0.94 $\pm$ 0.08                                                                    |
| 3     | VCE-003.2       | 5                 | 1000                     | 2.6 $\pm$ 1.9                                                                        | 0.85 $\pm$ 0.13                                                                    |
| 4     | VCE-003.2       | 5                 | 2000                     | 2.6 $\pm$ 1.1                                                                        | 0.89 $\pm$ 0.06                                                                    |
| 5     | CP              | 3                 | 19                       | 72.0 $\pm$ 19.3 <sup>(3)</sup>                                                       | 0.31 $\pm$ 0.08 <sup>(3)</sup>                                                     |

Vehicle control = sesame oil

CP = Cyclophosphamide.

(1) At least 4000 polychromatic erythrocytes were evaluated with a maximum deviation of 5%.

(2) The ratio was determined from at least the first 500 erythrocytes counted.

(3) Significantly different from corresponding control group (Students t test, P < 0.001).

No biological relevant increase in the mean frequency of micronucleated polychromatic erythrocytes was observed in the bone marrow of animals treated with VCE-003.2 compared to the vehicle treated animals. Cyclophosphamide, the positive control material, induced a statistically significant increase in the number of micronucleated polychromatic erythrocytes.

**Comparative Metabolism in Cryopreserved Hepatocytes from Mouse, Rat, Dog, Minipig, Monkey and Human:** Incubations with VCE-003.2 at 1  $\mu$ M were performed in triplicate at 0, 5, 15, 30, 60 and 120 minutes for all species while incubations with the test item at 10  $\mu$ M were performed singularly at 0, 5, 15, 30, 60 and 120 minutes.

The metabolic activity of the hepatocytes was confirmed for each species by measuring cytochrome P450 (CYP)-dependent enzymatic activity (phenacetin metabolism) and phase II enzymatic activity (7-hydroxycoumarin [HC] metabolism). All hepatocyte batches used metabolized phenacetin and HC, indicating that they were metabolically active. Following incubations of VCE-003.2 with mouse, rat, dog, minipig, monkey and human hepatocytes, samples were analyzed by LC-PDA-MS for metabolic stability assessment and for metabolite profiling purposes.

Twenty-six metabolites of VCE-003.2 were found in the hepatocyte incubations of the six species investigated. Based on the MS peak intensities, the major metabolites of VCE-003.2 in the 120 minutes hepatocyte incubation samples were M13, M15, M17, M19 and M20 which were present in at least four of the six species tested. No human specific metabolites were observed. Five metabolites (M13, M15, M17, M19 and M20) were selected for identification purposes. Metabolic reactions observed included oxidations, loss of C<sub>3</sub>H<sub>6</sub> in combination with two oxidations, and a desaturation in combination with one or two oxidations. The identification and presence of metabolites detected in the hepatocyte incubations of the different species are presented in table 4.

**Table 4. Interspecies Comparison of the Metabolite profile of VCE-003.2**

| Code             | Rt (min) <sup>1)</sup> | m/z of [M+H] <sup>+</sup> | Mass shift (Da) <sup>2)</sup> | Proposed Metabolic Reaction(s) <sup>3)</sup>                 | Detected in |   |   |    |    |   |
|------------------|------------------------|---------------------------|-------------------------------|--------------------------------------------------------------|-------------|---|---|----|----|---|
|                  |                        |                           |                               |                                                              | M           | R | D | Mi | Cm | H |
| M1               | 7.1                    | 538.3375                  | 164.0689                      | Reduction and glucoside conjugation                          | -           | - | + | -  | -  | - |
| M2               | 7.6-8.0                | 552.3166                  | 178.0480                      | Oxidation and glucoside conjugation                          | -           | + | + | -  | -  | - |
| M3               | 13.6-13.9              | 679.3374                  | 305.0688                      | GSH Conjugation                                              | +           | + | + | +  | +  | + |
| M4               | 13.6-14.1              | 663.3422                  | 289.0736                      | Dehydration and GSH conjugation                              | -           | + | + | +  | +  | + |
| M5               | 14.9-15.8              | 566.2959                  | 192.0273                      | Oxidation and glucuronide conjugation                        | -           | + | + | +  | +  | + |
| M6               | 14.9-15.4              | 520.3395                  | 146.0709                      | Hydration and glutamine conjugation                          | +           | + | + | +  | +  | + |
| M7               | 15.4-15.8              | 520.3395                  | 146.0709                      | Hydration and glutamine conjugation                          | +           | + | + | +  | +  | + |
| M8               | 15.5-16.1              | 258.2429                  | -116.0257                     | unknown                                                      | +           | + | + | +  | +  | + |
| M9               | 15.4                   | 388.2479                  | 13.9793                       | Desaturation and oxidation                                   | -           | - | + | -  | -  | - |
| M10              | 15.4-15.9              | 548.2851                  | 174.0165                      | Desaturation and glucuronide conjugation                     | +           | + | + | +  | +  | + |
| M11              | 15.9-16.3              | 548.2851                  | 174.0165                      | Desaturation and glucuronide conjugation                     | +           | - | + | -  | +  | + |
| M12              | 15.8-16.2              | 408.2743                  | 34.0057                       | Hydration and oxidation                                      | +           | + | + | +  | +  | + |
| <b>M13</b>       | <b>16.2-16.8</b>       | <b>364.2120</b>           | <b>-10.0566</b>               | <b>Loss of C<sub>3</sub>H<sub>6</sub> and two oxidations</b> | -           | + | + | +  | +  | + |
| M14              | 17.4-17.6              | 404.2431                  | 29.9745                       | Desaturation and two oxidations                              | +           | - | + | -  | -  | + |
| <b>M15</b>       | <b>18.3-18.8</b>       | <b>404.2431</b>           | <b>29.9745</b>                | <b>Desaturation and two oxidations</b>                       | +           | + | - | +  | +  | + |
| M16              | 18.5-18.9              | 372.2534                  | -2.0152                       | Desaturation                                                 | -           | + | + | -  | -  | - |
| <b>M17</b>       | <b>18.5-19.0</b>       | <b>390.2638</b>           | <b>15.9952</b>                | <b>Oxidation</b>                                             | +           | + | + | +  | +  | + |
| M18              | 19.0-19.4              | 372.2534                  | -2.0152                       | Desaturation                                                 | -           | + | + | -  | -  | - |
| <b>M19</b>       | <b>19.5-19.9</b>       | <b>390.2638</b>           | <b>15.9952</b>                | <b>Oxidation</b>                                             | +           | + | + | +  | +  | + |
| <b>M20</b>       | <b>19.6-20.1</b>       | <b>388.2481</b>           | <b>13.9795</b>                | <b>Desaturation and oxidation</b>                            | +           | + | - | +  | -  | + |
| M21              | 19.4-20.1              | 390.2638                  | 15.9952                       | Oxidation                                                    | -           | + | + | +  | +  | + |
| M22              | 20.4-21.0              | 372.2532                  | -2.0154                       | Desaturation                                                 | +           | + | + | +  | +  | + |
| M23              | 20.4                   | 388.2481                  | 13.9795                       | Desaturation and oxidation                                   | +           | + | - | -  | -  | - |
| M24              | 20.3-20.8              | 390.2638                  | 15.9952                       | Oxidation                                                    | +           | + | + | +  | +  | + |
| M25              | 22.1-22.6              | 346.2377                  | -28.0309                      | Loss of C <sub>2</sub> H <sub>4</sub>                        | +           | + | + | +  | +  | + |
| M26              | 23.8-24.3              | 372.2534                  | -2.0152                       | Desaturation                                                 | +           | + | + | +  | +  | + |
| <b>Test item</b> | <b>25.1-25.5</b>       | <b>374.2685</b>           | <b>-0.0001</b>                | <b>NA</b>                                                    | +           | + | + | +  | +  | + |

Rt: retention time; min: minutes; M: mouse; R: rat; D: dog; Mi: minipig; Cm: Cynomolgus monkey H: human; NA: not applicable

Bold = peak intensity  $\geq 8.1E4$  in at least one of the species; tentatively identified metabolites.

<sup>1)</sup> Range of retention time mentioned as observed in different runs and different species

<sup>2)</sup> Mass shift compared to parent compound

<sup>3)</sup> Based on mass shift compared to parent compound

**Figure 1: The postulated major metabolic pathway for the test item (based on the id**

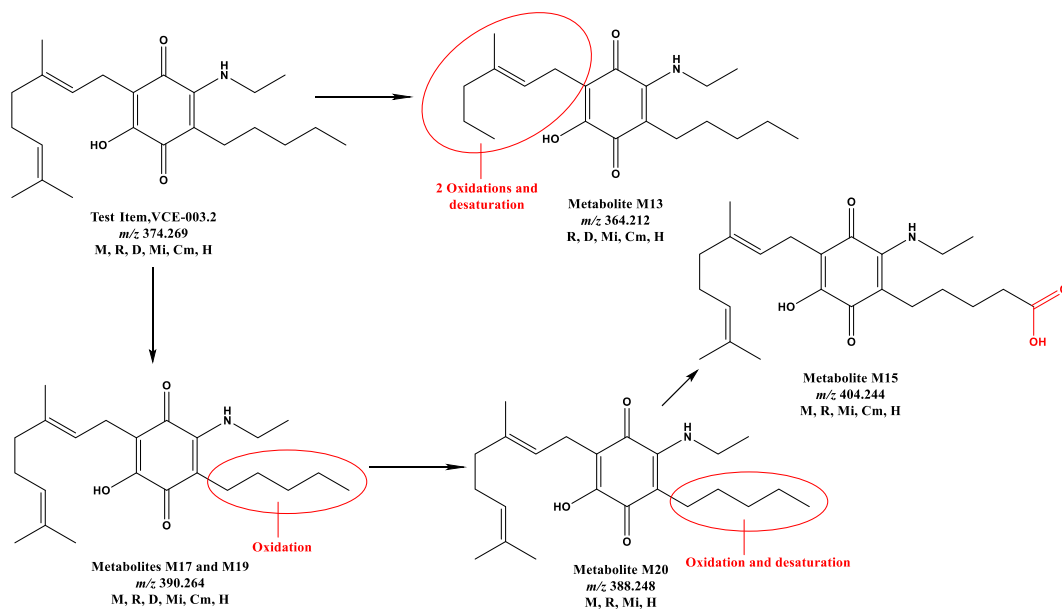

M: mouse; R: rat; D: dog; Mi: minipig; Cm: Cynomolgus monkey; H: human

**In vitro Interaction Studies of VCE-003.2 with human BCRP, BSEP and MDR1 Efflux (ABC) Transporters, and with human MATE1, MATE2-K, OAT1, OAT3, OATP1B1, OATP1B3, OCT1 and OCT2 Uptake Transporters:** The purpose of this study was to evaluate VCE-003.2 as an inhibitor and/or substrate of the human ABC (efflux) transporters: BCRP, BSEP and MDR1, and the human SLC (uptake) transporters: MATE1, MATE2-K, OAT1, OAT3, OATP1B1, OATP1B3, OCT1 and OCT2 (Table 5).

**Table 5: Test article (VCE-003.2) and transporter assays**

| Test article | Transporter                                        | Assay               | Applied nominal concentrations |
|--------------|----------------------------------------------------|---------------------|--------------------------------|
| VCE-003.2    | BCRP<br>MDR1                                       | Monolayer substrate | 0.1, 1, 10 and 22.5 µM         |
|              | BCRP<br>BSEP<br>MDR1                               | VT inhibition       | 2.25 and 22.5 µM               |
|              | MATE1<br>MATE2-K                                   |                     | 1 and 5 µM                     |
|              | OAT1<br>OAT3<br>OATP1B1<br>OATP1B3<br>OCT1<br>OCT2 | Uptake inhibition   | 1.125 and 11.25 µM             |
|              | MATE1<br>MATE2-K<br>OAT1<br>OCT1                   |                     | 0.1, 1, 10 and 20 µM           |
|              | OAT3<br>OATP1B1<br>OATP1B3<br>OCT2                 | Uptake substrate    | 0.1, 1, 10 and 22.5 µM         |

VT: vesicular transport assay

The concentration range tested *in vitro* was selected based upon solubility limit in assay buffers and cytotoxic effects of VCE-003.2.

Tabulated summary of results and methods is provided in Table 6 and Table 7.

**Table 6. Summary of the obtained results – ABC transporter assays**

**Pharmacokinetics:** Inhibition of BCRP, BSEP and MDR1 and/or substrate of BCRP and MDR1.

**Type of Study:** A non-GLP in vitro study to determine whether VCE-003.2 is an inhibitor of BCRP, BSEP, and MDR1 transporters using inside-out membrane vesicles prepared from cells overexpressing human ABC (efflux) transporters. The study design also included solubility and non-specific binding assessments.

A non-GLP in vitro study to determine whether VCE-003.2 is a substrate of BCRP or MDR1 transporters using BCRP or MDR1 transfected MDCKII cell monolayers. The study design also included solubility, recovery and cytotoxicity assessments.

**Method:** For inhibition assessment, vesicles were incubated in the respective assay buffer containing the probe substrate in the presence of VCE-003.2 (2.25 and 22.5  $\mu\text{M}$ ). The reaction was initiated with the addition of ATP or AMP to the solution; following the incubation time, the reaction was stopped by the addition of 200  $\mu\text{L}$  of ice-cold washing buffer and immediately filtered via glass fiber filters mounted to a 96-well plate (filter plate). The filters were washed, dried and the amount of substrate inside the filtered vesicles was determined by liquid scintillation counting.

E3S (1  $\mu\text{M}$ ) for BCRP, TC (0.2  $\mu\text{M}$ ) for BSEP and NMQ (1  $\mu\text{M}$ ) for MDR1 were used as positive control substrates.

Bidirectional transport of VCE-003.2 was determined through control, MDCKII-BCRP and Abcb1KO-MDCKII-MDR1 cell monolayers. Assay buffer containing VCE-003.2 at four concentrations (0.1, 1, 10 and 22.5  $\mu\text{M}$ ) with and without reference inhibitor was added to the appropriate apical or basolateral chamber. Samples were taken from the helper plate before the incubation and from the donor chambers after the incubation to determine the initial concentration (C0) and recovery (R) of the test compound and the controls. After incubation the receiver chambers were sampled to determine the amount of translocated VCE-003.2 and controls. Samples were analyzed using LC-MS/MS.

Prazosin (1  $\mu\text{M}$ ) for BCRP and Digoxin (1  $\mu\text{M}$ ) for MDR1 were used as positive control

**Analysis:** Radiodetection / LC-MS/MS

**Inhibition assessment of ABC transport by VCE-003.2**

| Transporter | Maximum % inhibition | IC50 ( $\mu\text{M}$ ) |
|-------------|----------------------|------------------------|
| BCRP        | 89 %                 | NA                     |
| BSEP        | 26 %                 | NA                     |
| MDR1        | 81 %                 | NA                     |

**Bidirectional permeability of VCE-003.2 for ABC transporters**

| Transporter | Maximum net ER | Substrate |
|-------------|----------------|-----------|
| BCRP        | NA             | ND        |
| MDR1        | NA             | ND        |

NA: not applicable; ND: not determined.

**Table 7. Summary of the obtained results – SLC transporter assays**

**Pharmacokinetics:**Inhibition of MATE1, MATE2-K, OAT1, OAT3, OATP1B1, OATP1B3, OCT1 and OCT2 and/or substrate of MATE1, MATE2-K, OAT1, OAT3, OATP1B1,OATP1B3, OCT1 and OCT2

**Type of Study:** A non-GLP in vitro study to determine whether VCE-003.2 is an inhibitor of or substrate of MATE1, MATE2-K, OAT1, OAT3, OATP1B1, OATP1B3, OCT1 and OCT2 transporters using Madin-Darby canine kidney mammalian (MDCKII) and human embryonic kidney mammalian (HEK293) cells expressing MATE1, MATE2-K, OAT1, OAT3, OATP1B1, OATP1B3, OCT1 and OCT2. The study design also included solubility, non-specific binding and cytotoxicity assessments.

**Method:** For inhibition assessment, cells were pre-incubated for 30 minutes in the respective assay buffer in the presence of VCE-003.2 (1 and 5 or 1.125 and 11.25  $\mu$ M). Then the probe substrate was added in a fresh dosing solution of VCE-003.2, following the incubation time, the reaction was stopped by washing the cells with ice-cold buffer. The cells were lysed with 0.1 M NaOH solution and the accumulation of the probe substrat in the cells was determined by liquid scintillation counting.

For substrate assessment, cells were incubated for 10 minutes in the respective assay buffer in the presence of VCE-003.2 (0.1, 1, 10  $\mu$ M and 20 or 0.1, 1, 10 and 22.5  $\mu$ M) with and without the respective reference inhibitor. Following the incubation time, the reaction was stopped by washing the cells with ice-cold buffer. The cells were lysed wit methanol:buffer mixture (2:1) and the accumulation of VCE-003.2 in the cells was determined by mass-spectrometry.

Metformin (10  $\mu$ M) for MATE1, MATE2-K, OCT1 and OCT2, Tenofovir (5  $\mu$ M) for OAT1, E3S (1  $\mu$ M) for OAT3, E217 $\beta$ G (1  $\mu$ M) for OATP1B1 and CCK-8 (1  $\mu$ M) for OATP1B3 were used as positive control substrates.

**Analysis:** Radiodetection / LC-MS/MS

**Inhibition assessment of SLC transport by VCE-003.2**

| Transporter | Maximum % inhibition | IC50 ( $\mu$ M) |
|-------------|----------------------|-----------------|
| MATE1       | NIO                  | NA              |
| MATE2-K     | NIO                  | NA              |
| OAT1        | NIO                  | NA              |
| OAT3        | NIO                  | NA              |
| OATP1B1     | NIO                  | NA              |
| OATP1B3     | NIO                  | NA              |
| OCT1        | NIO                  | NA              |
| OCT2        | NIO                  | NA              |

**Substrate assessment of VCE-003.2 for SLC transporters**

| Transporter | Maximum transporter-specific fold accumulation | Substrate |
|-------------|------------------------------------------------|-----------|
| MATE1       | < 2                                            | NO        |
| MATE2-K     | < 2                                            | NO        |
| OAT1        | < 2                                            | NO        |
| OAT3        | < 2                                            | NO        |
| OATP1B1     | < 2                                            | NO        |
| OATP1B3     | < 2                                            | NO        |
| OCT1        | < 2                                            | NO        |
| OCT2        | < 2                                            | NO        |

**NIO: no inhibition observed; NA: not applicable**
